# Supplementary material for: Blue Laser Light Counteracts HSV-1 in the SH-SY5Y Neuronal Cell Model of Infection
Source: MDPI journal article supplement (doi:10.3390/life12010055), 2022-01-01
Supplement: s1 [file s1]

# Supplementary Materials: Blue Laser Light Counteracts HSV-1 in SH-SY5Y Neuronal Cell Model of Infection

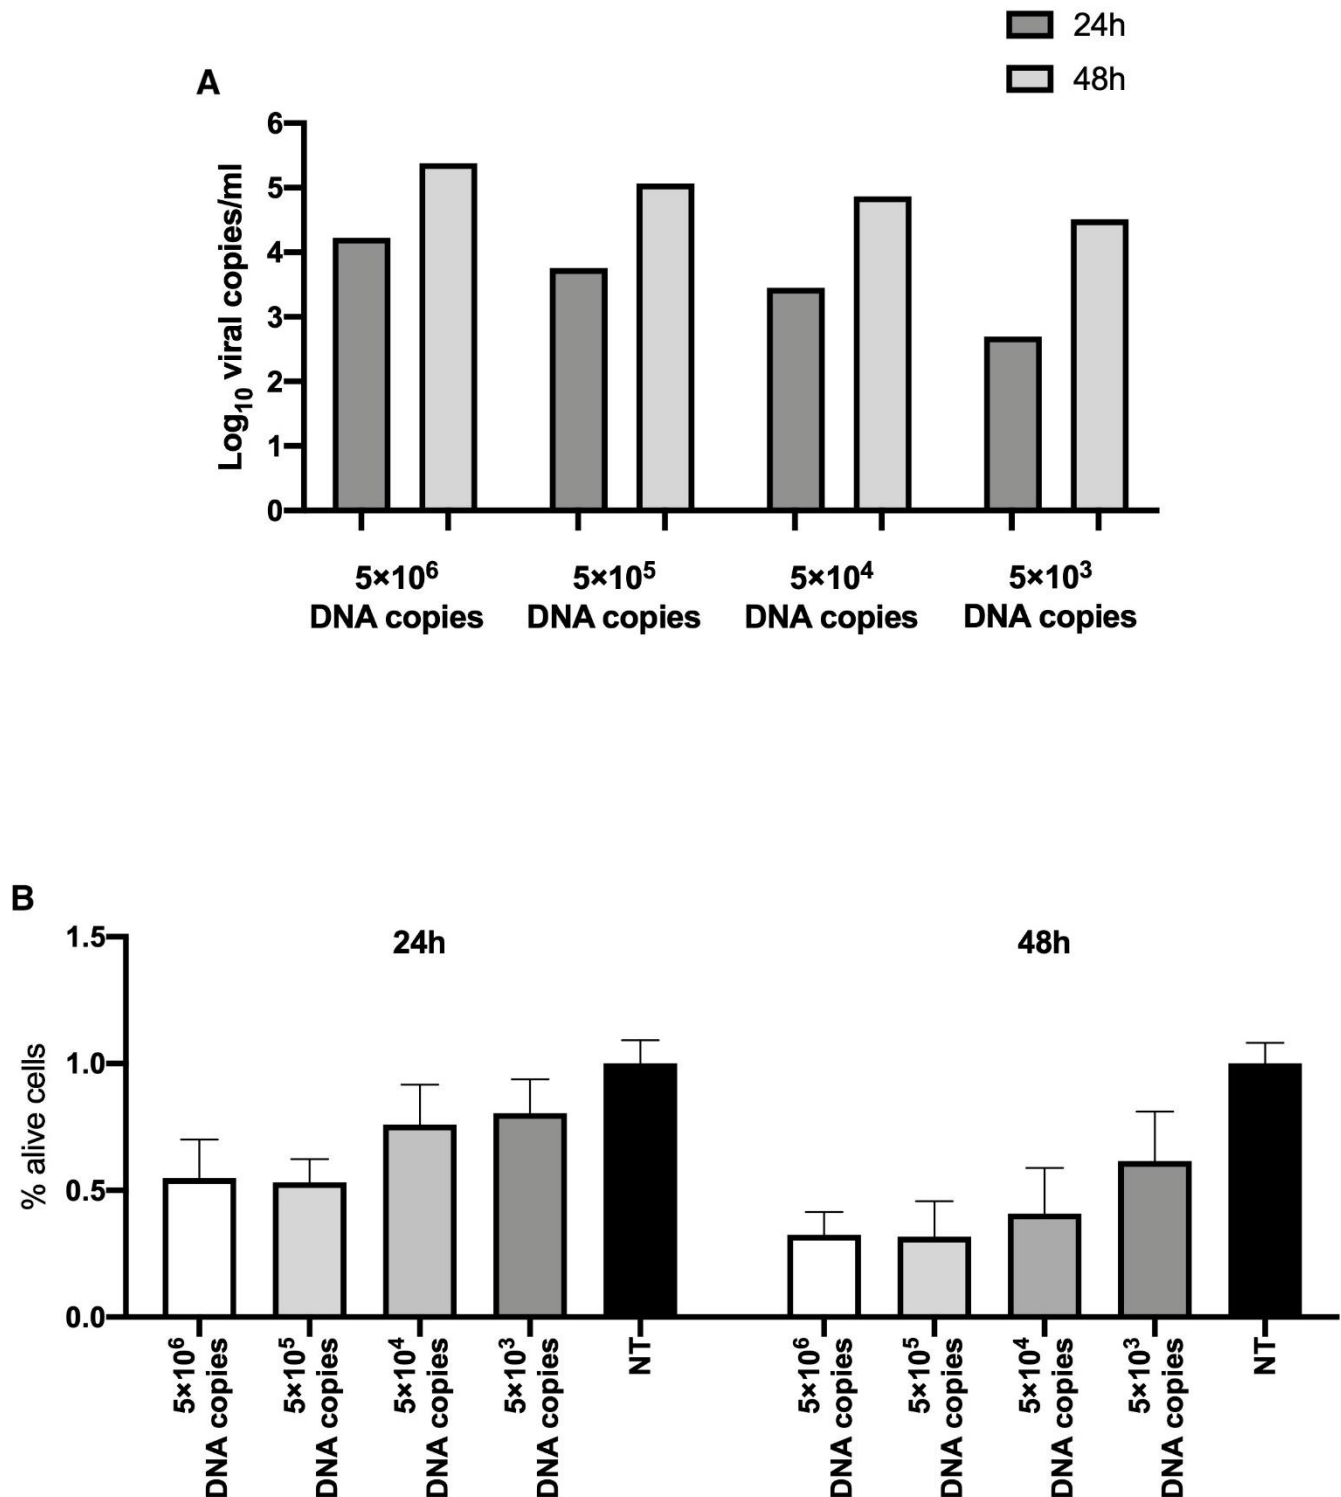

**Figure S1.** (A) HSV-1 DNA quantity after 24 or 48 hours from inoculation with the different serial dilutions of HSV-1 employed. The viral DNA was expressed as Log<sub>10</sub> viral copies/ml. (B) The viability of cells after 24 or 48 hours from inoculation with the different serial dilutions of HSV-1 employed. The results are expressed as percentage respect to the not treated (NT) cells.

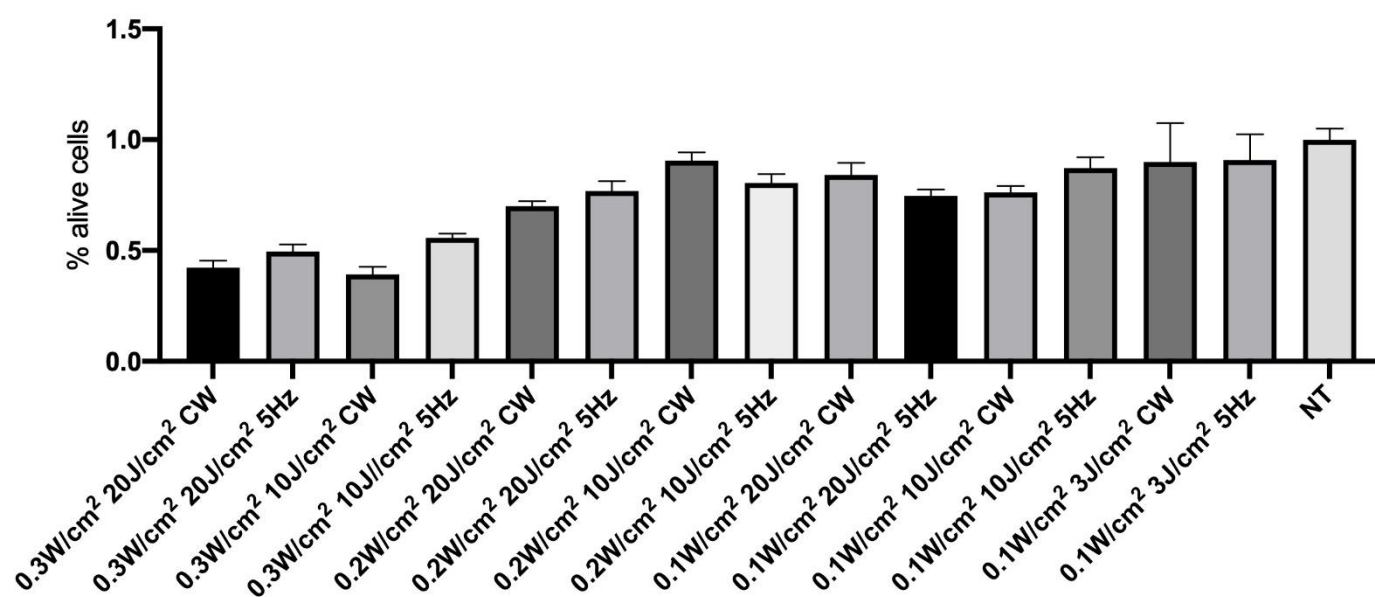

**Figure S2.** Cells viability after 24 hours from the irradiation with different PBMT protocols. The results are expressed as percentage respect to the not treated (NT) cells.
